# Supplementary material
Source: PubMed Central journal article supplement (PMC2268783)
Supplement: pnas_0800072105_1.pdf [file pnas_0800072105_1.pdf]

Number of resistant isolates

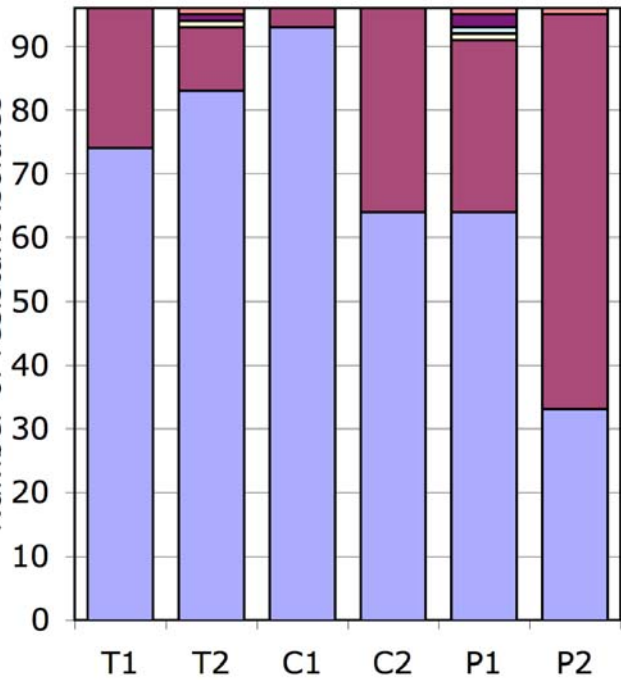

- 2 resistances
- 3 resistances
- 4 resistances
- 5 resistances
- 6 resistances
- 7 resistances

Soil samples
