# Supplementary material
Source: PubMed Central journal article supplement (PMC2268783)
Supplement: pnas_0800072105_2.pdf [file pnas_0800072105_2.pdf]

|                    | 442         | 458        | 759        |
|--------------------|-------------|------------|------------|
|                    |             |            |            |
|                    | ATGTGGTGCG  | GTGTTGACGC | CTGCAGCAAT |
| AB194682_blaTEM1   |             |            |            |
| M88143_blaTEM12    | .....       | .....      | .....      |
| Y14574_blaTEM17    | .....C..... | .....      | .....      |
| X98047_blaTEM42    | .....       | .....      | .....      |
| DQ286729_blaTEM55  | .....       | .....      | .....      |
| AF047171_blaTEM60  | .....       | .....      | .....      |
| AF188199_blaTEM70  | .....       | .....      | .....      |
| AF190694_blaTEM76  | .....       | .....      | .....      |
| AF190693_blaTEM78  | .....       | .....      | .....      |
| AF495873_blaTEM101 | .....       | .....      | .....      |
| AF516719blaTEM104  | .....       | .....      | .....      |
| AY101578_blaTEM106 | .....       | .....      | .....      |
| AY101764_blaTEM107 | .....       | .....      | .....      |
| AY628175_blaTEM109 | .....       | .....      | .....      |
| AF535127_blaTEM115 | .....       | .....      | .....      |
| AY271267_blaTEM121 | .....       | .....      | .....      |
| AY628176_blaTEM125 | .....       | .....      | .....      |
| AY452662_blaTEM129 | .....C..... | .....      | .....      |
| AY574271_blaTEM134 | .....       | .....      | .....      |
| AY853593_blaTEM138 | .....       | .....      | .....      |
| DQ909059_blaTEM157 | .....C..... | ..A.....   | ...T.....  |
| AY425988_blaTEM116 | .....C..... | ..A.....   | ...T.....  |
| groupA             | .....C..... | ..A.....   | ...T.....  |
| Bt1                | .....C..... | ..A.....   | ...T.....  |
| Bt2                | .....C..... | ..A.....   | ...T.....  |
| Bt3                | .....C..... | .....      | ...T.....  |
| Bt4                | .....C..... | ..A.....   | ...T.....  |
| Bt5                | .....C..... | ..A.....   | ...T.....  |
| Bt6                | .....C..... | ..A.....   | ...T.....  |
| Bt8                | .....C..... | .....      | ...T.....  |
| Bt9                | .....C..... | .....      | ...T.....  |
| Bt10               | .....C..... | .....      | ...T.....  |
| Bt13               | .....C..... | ..A.....   | ...T.....  |
| Bt14               | .....C..... | ..A.....   | ...T.....  |
| Bt16               | .....C..... | ..A.....   | ...T.....  |
| Bt17               | .....C..... | ..A.....   | ...T.....  |
| Bt18               | .....C..... | ..A.....   | ...T.....  |
| Bt20               | .....C..... | ..A.....   | ...T.....  |
| Bt21               | .....C..... | ..A.....   | ...T.....  |
| Bt22               | .....C..... | ..A.....   | ...T.....  |
| Bt23               | .....C..... | ..A.....   | ...T.....  |
| Bt24               | .....C..... | ..A.....   | ...T.....  |
| Bt26               | .....C..... | ..A.....   | ...T.....  |
| Bt27               | .....C..... | ..A.....   | ...T.....  |
| Bt28               | .....C..... | ..A.....   | ...T.....  |
| Bt29               | .....C..... | ..A.....   | ...T.....  |
| Bt30               | .....C..... | ..A.....   | ...T.....  |
| Bt32               | .....C..... | ..A.....   | ...T.....  |
| Bt33               | .....C..... | ..A.....   | ...T.....  |
| Bt34               | .....C..... | ..A.....   | ...T.....  |
| Bt35               | .....C..... | ..A.....   | ...T.....  |
| Bt36               | .....C..... | ..A.....   | ...T.....  |
| Bt37               | .....C..... | ..A.....   | ...T.....  |
| Bt38               | .....C..... | ..A.....   | ...T.....  |
| Bt39               | .....C..... | ..A.....   | ...T.....  |
| Bt40               | .....C..... | ..A.....   | ...T.....  |
| Bt41               | .....C..... | ..A.....   | ...T.....  |
| Bt42               | .....C..... | ..A.....   | ...T.....  |

|      |           |            |            |
|------|-----------|------------|------------|
| Bt43 | .....C... | ..A.....   | ...T.....  |
| Bt46 | .....C... | ..A.....   | ...T.....  |
| Bt47 | .....C... | ..A.....   | ...T.....  |
| Bt48 | .....C... | ..A.....   | ...T.....  |
| Bt49 | .....C... | ..A.....   | ...T.....  |
| Bt50 | .....C... | ..A.....   | ...T.....  |
| Bt51 | .....C... | ..A.....   | ...T.....  |
| Bt52 | .....C... | ..CA.....  | ...T.....  |
| Bt53 | .....C... | ..A.....   | ...T.....  |
| M1   | .....C... | ..A.....   | ...T.....  |
| M2   | .....C... | ..A.....   | ...T.....  |
| M3   | .....C... | ..A.....   | ...T.....  |
| M4   | .....C... | ..A.....   | ...T.....  |
| M5   | .....C... | ..A.....   | ...T.....  |
| M6   | .....C... | ..A.....   | ...T.....  |
| M7   | .....C... | ..A.....   | ...T.....  |
| M8   | .....C... | ..A.....   | ...T.....  |
| M9   | .....C... | ..A.....   | ...T.....  |
| M10  | .....C... | ..A.....   | ...T.....  |
| M11  | .....C... | ..A.....   | ...T.....  |
| M13  | .....C... | ..A.....   | ...T.....  |
| M14  | .....C... | ..A.....   | ...T.....  |
| M15  | .....C... | ..A.....   | ...T.....  |
| M16  | .....C... | ..A.....   | ...T.....  |
| M17  | .....C... | ..A.....   | ...T.....  |
| M18  | .....C... | ..A.....   | ...T.....  |
| M20  | .....C... | ..A.....   | ...T.....  |
| M21  | .....C... | ..A.....   | ...T.....  |
| M22  | .....C... | ..A.....   | ...T.....  |
| M23  | .....C... | ..A.....   | ...T.....  |
| M24  | .....C... | ..A.....   | ...T.....  |
| M26  | .....C... | ..A.....   | ...T.....  |
| M27  | .....C... | ..A.....A. | ..CAT..... |
| M28  | .....C... | ..A.....   | ...T.....  |
| M29  | .....C... | ..A.....   | ...T.....  |
| M30  | .....C... | ..A.....   | ...T.....  |
| M31  | .....C... | ..A.....   | ...T.....  |
| M32  | .....C... | ..A.....   | ...T.....  |
| M34  | .....C... | ..A.....   | ...T.....  |
| M35  | .....C... | ..A.....   | ...T.....  |
| M36  | .....C... | ..A.....   | ...T.....  |
| M37  | .....C... | ..A.....   | ...T.....  |
| M38  | .....C... | ..A.....   | ...T.....  |
| M39  | .....C... | ..A.....   | ...T.....  |
| M40  | .....C... | ..A.....   | ...T.....  |
| M41  | .....C... | ..A.....   | ...T.....  |
| M43  | .....C... | ..A.....   | ...T.....  |
| M44  | .....C... | ..A.....   | ...T.....  |
| M45  | .....C... | ..A.....   | ...T.....  |
| M46  | .....C... | ..A.....   | ...T.....  |
| M47  | .....C... | ..A.....   | ...T.....  |
| M49  | .....C... | ..A.....   | ...T.....  |
| M50  | .....C... | ..A.....   | ...T.....  |
| M51  | .....C... | ..A.....   | ...T.....  |
| M52  | .....C... | ..A.....   | ...T.....  |
| M53  | .....C... | ..A.....   | ...T.....  |
| M54  | .....C... | ..A.....   | ...T.....  |
| M55  | .....C... | ..A.....   | ...T.....  |
| M56  | .....C... | ..A.....   | ...T.....  |
| S1   | .....C... | ..A.....   | ...T.....  |
| S2   | .....C... | ..A.....   | ...T.....  |
| S3   | .....C... | ..A.....   | ...T.....  |
| S4   | .....C... | ..A.....   | ...T.....  |

|     |           |          |            |
|-----|-----------|----------|------------|
| S5  | .....C... | ..A..... | ...T.....  |
| S6  | .....C... | ..A..... | ...T.....  |
| S7  | .....C... | ..A..... | ...T.....  |
| S8  | .....C... | ..A..... | ...T.....  |
| S11 | .....C... | ..A..... | ...T.....  |
| S12 | .....C... | ..A..... | ...T.....  |
| S13 | .....C... | ..A..... | ...T.....  |
| S14 | .....C... | ..A..... | ...T.....  |
| S15 | .....C... | ..A..... | ...T.....  |
| S16 | .....C... | ..A..... | ...T.....  |
| S18 | .....C... | ..A..... | ...T.....  |
| S19 | .C...C... | ..A..... | ...T.....  |
| S20 | .....C... | ..A..... | ...T.....  |
| S21 | .....C... | ..A..... | ...T.....  |
| S22 | .....C... | ..A..... | ...T.....  |
| S23 | .....C... | ..A..... | ...T.....  |
| S24 | .....C... | ..A..... | ...T.....  |
| S25 | .....C... | ..A..... | ...T.....  |
| S26 | .....C... | ..A..... | ...T.....  |
| S27 | .....C... | ..A..... | ...T.....  |
| S28 | .....C... | ..A..... | ...T.....  |
| S29 | .....C... | ..A..... | ...T.....  |
| S31 | .C...C... | ..A..... | ...T.....  |
| S32 | .....C... | ..A..... | ...T.....  |
| S34 | .....C... | ..A..... | ...T.....  |
| S35 | .....C... | ..A..... | ...T.....  |
| S36 | .....C... | ..A..... | ...T.....  |
| S37 | .....C... | ..A..... | ...T.....  |
| S39 | .....C... | ..A..... | ...T.....  |
| S40 | .....C... | ..A..... | ...T...G.. |
| S42 | .....C... | ..A..... | ...T.....  |
| S43 | .....C... | ..A..... | ...T.....  |
| S44 | .....C... | ..A..... | ...T.....  |
| S46 | .....C... | ..A..... | ...T.....  |
| S47 | .....C... | ..A..... | ...T.....  |
| S48 | .....C... | ..A..... | ...T.....  |
| S49 | .....C... | ..A..... | ...T.....  |
| S50 | .....C... | ..A..... | ...T.....  |
| S51 | .....C... | ..A..... | ...T.....  |
| S53 | .....C... | ..A..... | ...T.....  |
| S54 | .....C... | ..A..... | ...T.....  |
| S55 | .....C... | ..A..... | ...T.....  |
| S56 | .....C... | ..A..... | ...T.....  |
| S57 | .....C... | ..A..... | ...T.....  |
| S58 | .....C... | A.A..... | ...T.....  |
| S59 | .....C... | ..A..... | ...T.....  |
| S60 | .....C... | ..A..... | ...T.....  |
| S61 | .....C... | ..A..... | ...T.....  |
| S62 | .....C... | ..A..... | ...T.....  |
| S63 | .....C... | ..A..... | ...TG..... |
| S64 | .....C... | ..A..... | ...T.....  |
| S65 | .....C... | ..A..... | ...T.....  |
| S66 | .....C... | ..A..... | ...T.....  |
| S67 | .....C... | ..A..... | ...T.....  |
| S68 | .....C... | ..A..... | ...T.....  |
