# Supplementary material
Source: PubMed Central journal article supplement (PMC2268783)
Supplement: pnas_0800072105_5.pdf [file pnas_0800072105_5.pdf]

Supporting Table 1. Number of total (b g<sup>-1</sup>) and ampicillin-resistant (R g<sup>-1</sup>) cultivable bacteria in soil samples collected in a transgenic corn field (T1 and T2 samples), a traditional corn field (C1 and C2 samples) and a prairie soil (P1 and P2) expressed as a mean ± standard deviation. Percentages of ampicillin resistant bacteria were obtained by dividing the number of ampicillin resistant bacteria by the number of total cultivable bacteria.

| Soil sample | Total bacteria<br>(b g <sup>-1</sup> )      | Amp-resistant bacteria<br>(R g <sup>-1</sup> ) | Amp-resistant bacteria<br>(% of total bacteria) |
|-------------|---------------------------------------------|------------------------------------------------|-------------------------------------------------|
| T1          | 2.0 <sup>E</sup> +04 ± 5.4 <sup>E</sup> +03 | 1.3 <sup>E</sup> +03 ± 2.4 <sup>E</sup> +01    | 6.5                                             |
| T2          | 2.5 <sup>E</sup> +05 ± 4.2 <sup>E</sup> +04 | 9.4 <sup>E</sup> +02 ± 5.0 <sup>E</sup> +01    | 0.4                                             |
| C1          | 1.7 <sup>E</sup> +04 ± 5.1 <sup>E</sup> +03 | 1.3 <sup>E</sup> +03 ± 5.0 <sup>E</sup> +01    | 8.0                                             |
| C2          | 1.8 <sup>E</sup> +04 ± 3.0 <sup>E</sup> +03 | 9.6 <sup>E</sup> +02 ± 2.0 <sup>E</sup> +02    | 5.5                                             |
| P1          | 2.2 <sup>E</sup> +04 ± 4.2 <sup>E</sup> +03 | 1.6 <sup>E</sup> +04 ± 4.3 <sup>E</sup> +03    | 69.6                                            |
| P2          | 1.8 <sup>E</sup> +04 ± 1.9 <sup>E</sup> +03 | 9.7 <sup>E</sup> +03 ± 3.7 <sup>E</sup> +02    | 54.4                                            |
