# Supplementary material
Source: PubMed Central journal article supplement (PMC2268783)
Supplement: pnas_0800072105_6.pdf [file pnas_0800072105_6.pdf]

Supporting Table 2. Primers sequences used in this study.

| Target<br>gene | Primer<br>name | Primer sequence (5'-3')   | Position  | Amplicon size<br>(bp) | Reference |
|----------------|----------------|---------------------------|-----------|-----------------------|-----------|
| <i>bla</i> TEM | <i>bla1</i>    | CATTTCCGTGTCGCCCTTATTCC   | 227-249   | 828                   | (1)       |
|                | <i>bla2</i>    | GGCACCTATCTCAGCGATCTGTCTA | 1031-1054 |                       |           |
| 16S rDNA       | pA             | AGAGTTTGATCCTGGCTCAG      | 8-27      | 1534                  | (2)       |
|                | pH'            | AAGGAGGTGATCCAGCCGCA      | 1522-1541 |                       |           |
