# Supplementary material
Source: PubMed Central journal article supplement (PMC2268783)
Supplement: pnas_0800072105_7.pdf [file pnas_0800072105_7.pdf]

Supporting Table 3. Amino acid residues substitutions detected in the soil DNA compared to BLA-TEM1 shown at the top. Numbers in

parenthesis indicate the number of isolates containing a mutation for each position. Comparisons to TEM1 were done using the amino acid residues numeration as previously established (3).

|                     |                               |                    |                    |                |                |                |                     |               |                    |               |               |                    |                 |               |                    |                    |                    |               |               |                    |               |                      |               |               |               |                         |               |               |                         |
|---------------------|-------------------------------|--------------------|--------------------|----------------|----------------|----------------|---------------------|---------------|--------------------|---------------|---------------|--------------------|-----------------|---------------|--------------------|--------------------|--------------------|---------------|---------------|--------------------|---------------|----------------------|---------------|---------------|---------------|-------------------------|---------------|---------------|-------------------------|
| Postion<br>BLA-TEM1 | 1                             | 8                  | 9                  | 10             | 11             | 12             | 13                  | 14            | 15                 | 16            | 17            | 18                 | 19              | 20            | 21                 | 24                 | 26                 | 29            | 31            | 32                 | 33            | 34                   | 35            | 31            | 42            | 51                      | 52            | 56            | 58                      |
| Soil DNA            | R<br>I<br>L<br>(4)            | C<br>S<br>(3)      | P<br>V<br>(11)     | C<br>S<br>(10) | R<br>P<br>(10) | R<br>P<br>(10) | N<br>Y<br>F<br>(11) | S<br>(9)      | L<br>S<br>(6)      | S<br>L<br>(4) | S<br>(1)      | A<br>(1)           | A<br>(1)        | F<br>(1)      | C<br>R<br>Y<br>(4) | L<br>F<br>S<br>(2) | H<br>L<br>(1)      | T<br>A<br>(1) | V<br>A<br>(1) | K<br>E<br>(1)      | V<br>A<br>(1) | K<br>N<br>(3)        | D<br>G<br>(1) | E<br>G<br>(1) | A<br>V<br>(1) | L<br>P<br>(1)           | N<br>S<br>(2) | I<br>V<br>(1) | E<br>G<br>(4)           |
| Postion<br>BLA-TEM1 | 60                            | 61                 | 63                 | 64             | 68             | 69             | 70                  | 72            | 73                 | 74            | 77            | 82                 | 84              | 86            | 92                 | 94                 | 95                 | 96            | 91            | 98                 | 99            | 100                  | 101           | 102           | 104           | 106                     | 107           | 113           | 119                     |
| Soil DNA            | F<br>L<br>(1)                 | R<br>P<br>(1)      | E<br>K<br>(1)      | E<br>G<br>(2)  | M<br>V<br>(1)  | M<br>V<br>(2)  | S<br>G<br>(1)       | F<br>L<br>(1) | K<br>R<br>(2)      | V<br>I<br>(1) | C<br>R<br>(2) | S<br>F<br>(1)      | V<br>I<br>(135) | A<br>T<br>(1) | G<br>S<br>(1)      | R<br>H<br>(1)      | I<br>V<br>T<br>(3) | H<br>R<br>(5) | Y<br>C<br>(4) | S<br>P<br>(2)      | Q<br>R<br>(4) | N<br>D<br>(2)        | D<br>G<br>(1) | L<br>M<br>(1) | E<br>K<br>(1) | S<br>L<br>A<br>P<br>(4) | P<br>S<br>(1) | L<br>P<br>(3) | V<br>A<br>(1)           |
| Postion<br>BLA-TEM1 | 121                           | 123                | 124                | 130            | 135            | 136            | 139                 | 140           | 141                | 144           | 151           | 154                | 159             | 162           | 164                | 165                | 175                | 176           | 177           | 179                | 182           | 184                  | 189           | 190           | 192           | 193                     | 199           | 202           | 204                     |
| Soil DNA            | E<br>G<br>(2)                 | C<br>R<br>(1)      | S<br>G<br>(1)      | S<br>G<br>(3)  | A<br>V<br>(2)  | N<br>D<br>(2)  | L<br>P<br>(1)       | T<br>A<br>(3) | T<br>A<br>(1)      | G<br>R<br>(1) | F<br>L<br>(1) | N<br>S<br>I<br>(3) | V<br>A<br>(1)   | L<br>P<br>(1) | R<br>H<br>(1)      | W<br>L<br>(1)      | N<br>I<br>(2)      | D<br>G<br>(2) | E<br>G<br>(1) | D<br>G<br>N<br>(2) | M<br>T<br>(1) | A<br>V<br>I<br>(138) | T<br>A<br>(1) | L<br>M<br>(1) | K<br>R<br>(1) | L<br>P<br>(2)           | L<br>P<br>(1) | A<br>T<br>(1) | R<br>Q<br>(1)           |
| Postion<br>BLA-TEM1 | 210                           | 211                | 212                | 213            | 218            | 220            | 222                 | 226           | 230                | 233           | 234           | 236                | 240             | 241           | 243                | 247                | 248                | 252           | 255           | 259                | 260           | 262                  | 273           | 274           | 275           | 276                     | 277           | 278           | 279                     |
| Soil DNA            | W<br>R<br>(2)                 | M<br>I<br>V<br>(2) | E<br>G<br>K<br>(2) | A<br>V<br>(1)  | G<br>E<br>(1)  | L<br>H<br>(1)  | R<br>C<br>H<br>(2)  | P<br>S<br>(1) | F<br>L<br>S<br>(4) | D<br>V<br>(1) | K<br>R<br>(2) | G<br>E<br>(1)      | E<br>K<br>(1)   | R<br>H<br>(1) | S<br>P<br>(2)      | I<br>T<br>(2)      | A<br>T<br>(1)      | P<br>L<br>(1) | G<br>S<br>(2) | R<br>H<br>(1)      | I<br>F<br>(1) | V<br>A<br>(1)        | D<br>M<br>(1) | E<br>N<br>(1) | R<br>E<br>(1) | N<br>D<br>(2)           | R<br>D<br>(1) | Q<br>R<br>(3) | I<br>S<br>T<br>L<br>(8) |
| Postion<br>BLA-TEM1 | 280                           | 281                | 282                | 283            |                |                |                     |               |                    |               |               |                    |                 |               |                    |                    |                    |               |               |                    |               |                      |               |               |               |                         |               |               |                         |
| Soil DNA            | A<br>L<br>V<br>D<br>M<br>(23) | E<br>R<br>(25)     | I<br>R<br>V<br>(2) | G<br>V<br>(1)  |                |                |                     |               |                    |               |               |                    |                 |               |                    |                    |                    |               |               |                    |               |                      |               |               |               |                         |               |               |                         |
