# Supplementary material
Source: PubMed Central journal article supplement (PMC2268783)
Supplement: pnas_0800072105_8.pdf [file pnas_0800072105_8.pdf]

Supporting Table 4. BLA mutation comparisons between soil clones and medical isolates.

| Mutations | Soil clones    | Medical isolates          |
|-----------|----------------|---------------------------|
| F16L      | S61            | TEM125                    |
| L21F      | Bt9            | 20 TEM <i>e.g.</i> TEM115 |
| A42V      | S53            | TEM42                     |
| L51P      | Bt40           | TEM60                     |
| M69V      | M17, S19       | 8 TEM <i>e.g.</i> TEM78   |
| E104K     | Bt17           | 42 TEM <i>e.g.</i> TEM129 |
| S130G     | Bt35, S27      | 3 TEM <i>e.g.</i> TEM76   |
| R164H     | Bt10           | 18 TEM <i>e.g.</i> TEM109 |
| N175I     | Bt23           | TEM138                    |
| M182T     | Bt24           | 20 TEM <i>e.g.</i> TEM106 |
| R204Q     | Bt24           | TEM70                     |
| G218E     | S1             | TEM55                     |
| E240K     | Bt43           | 25 TEM <i>e.g.</i> TEM101 |
| N276D     | Bt24, S58      | 9 TEM <i>e.g.</i> TEM78   |
| A280V     | Bt24, S25, S28 | TEM101, TEM104            |
