# Supplementary material
Source: PubMed Central journal article supplement (PMC2268783)
Supplement: pnas_0800072105_9.pdf [file pnas_0800072105_9.pdf]

Supporting Table 5. Soil characteristics of samples collected in a transgenic corn field (T1 and T2), a traditional corn field (C1 and C2) and a prairie soil (P1 and P2) expressed as a mean  $\pm$  standard deviation.

| <b>Samples</b>                                 | <b>T1</b>      | <b>T2</b>      | <b>C1</b>      | <b>C2</b>      | <b>P1</b>       | <b>P2</b>       |
|------------------------------------------------|----------------|----------------|----------------|----------------|-----------------|-----------------|
| Sand (% $\pm$ sd)                              | 36.2 $\pm$ 2   | 38 $\pm$ 1.8   | 35.7 $\pm$ 1.8 | 35.7 $\pm$ 1.8 | 31.8 $\pm$ 0.9  | 32.6 $\pm$ 0.6  |
| Silt (% $\pm$ sd)                              | 35.2 $\pm$ 0.9 | 33.3 $\pm$ 0.4 | 34.2 $\pm$ 1.6 | 34.2 $\pm$ 1.6 | 33.5 $\pm$ 1.4  | 32.8 $\pm$      |
| Clay (% $\pm$ sd)                              | 29.7 $\pm$ 1.6 | 30.6 $\pm$ 2.2 | 24.7 $\pm$ 2.3 | 24.7 $\pm$ 2.3 | 29.8 $\pm$      | 27.5 $\pm$ 1.7  |
| Organic mat. (% $\pm$ sd)                      | 7.3 $\pm$ 0.8  | 7.4 $\pm$ 0.2  | 6.9 $\pm$ 0.7  | 6.9 $\pm$ 0.7  | 4.45 $\pm$ 0.6  | 2.65 $\pm$ 1.2  |
| pH (H <sub>2</sub> O $\pm$ sd)                 | 7.9 $\pm$ 0.3  | 7.7 $\pm$ 0.4  | 7.6 $\pm$ 0.2  | 7.6 $\pm$ 0.2  | 7.8 $\pm$ 0.2   | 7.7 $\pm$ 0.1   |
| Volumetric weight (gml <sup>-1</sup> $\pm$ sd) | 1.43 $\pm$ 0.6 | 1.46 $\pm$ 0.8 | 1.45 $\pm$ 0.4 | 1.45 $\pm$ 0.4 | 1.2 $\pm$ 0.4   | 1.15 $\pm$ 0.1  |
| Water-holding capacity (% $\pm$ sd)            | 35.8 $\pm$ 1.3 | 34.8 $\pm$ 2.1 | 36.1 $\pm$ 1.9 | 36.1 $\pm$ 1.9 | 14.81 $\pm$ 1.4 | 12.96 $\pm$ 1.7 |
