# Supplementary material
Source: PubMed Central journal article supplement (PMC2268783)
Supplement: pnas_0800072105_10.pdf [file pnas_0800072105_10.pdf]

Supporting Table 6. Concentration (ppm) of trace elements in soil samples collected in a transgenic corn field (T1 and T2 samples), a traditional corn field (C1 and C2 samples) and a prairie soil (P1 and P2 samples), analyzed by ICP-MS and expressed as a mean  $\pm$  standard deviation.

|    | Mg              | Al <sub>3</sub>  | Ca              | Mn           | Fe              | Co              | Ni               | Cu               |
|----|-----------------|------------------|-----------------|--------------|-----------------|-----------------|------------------|------------------|
| T1 | 7982 $\pm$ 215  | 23549 $\pm$ 104  | 42457 $\pm$ 609 | 432 $\pm$ 9  | 21525 $\pm$ 458 | 8.12 $\pm$ 03   | 16.25 $\pm$ 042  | 14.25 $\pm$ 0.73 |
| T2 | 6632 $\pm$ 163  | 35424 $\pm$ 403  | 45321 $\pm$ 487 | 456 $\pm$ 17 | 23467 $\pm$ 642 | 8.86 $\pm$ 041  | 19.43 $\pm$ 054  | 16.54 $\pm$ 0.44 |
| C1 | 6398 $\pm$ 192  | 34716 $\pm$ 833  | 43197 $\pm$ 605 | 290 $\pm$ 8  | 24012 $\pm$ 398 | 9.38 $\pm$ 0.10 | 21.74 $\pm$ 0.24 | 17.40 $\pm$ 0.67 |
| C2 | 5344 $\pm$ 193  | 30874 $\pm$ 1202 | 33139 $\pm$ 401 | 242 $\pm$ 14 | 20509 $\pm$ 592 | 7.83 $\pm$ 0.31 | 18.31 $\pm$ 0.31 | 14.90 $\pm$ 0.27 |
| P1 | 7570 $\pm$ 186  | 29893 $\pm$ 412  | 28454 $\pm$ 113 | 485 $\pm$ 6  | 22081 $\pm$ 532 | 8.52 $\pm$ 0.13 | 20.11 $\pm$ 0.34 | 14.67 $\pm$ 0.30 |
| P2 | 10886 $\pm$ 593 | 27579 $\pm$ 1341 | 47175 $\pm$ 77  | 392 $\pm$ 6  | 22048 $\pm$ 212 | 7.95 $\pm$ 0.29 | 19.25 $\pm$ 0.79 | 14.97 $\pm$ 0.16 |
