# Supplementary material
Source: PubMed Central journal article supplement (PMC2268783)

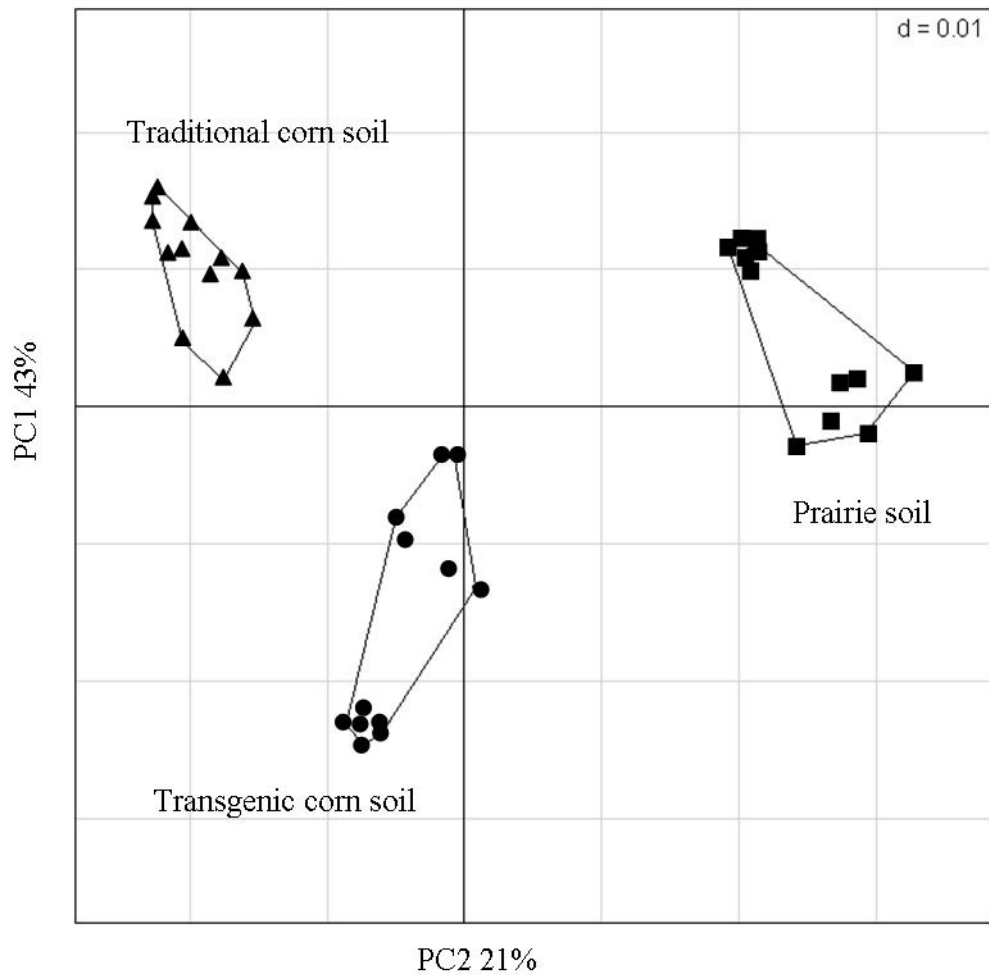

Supplement: pnas_0800072105_3.pdf [file pnas_0800072105_3.pdf]

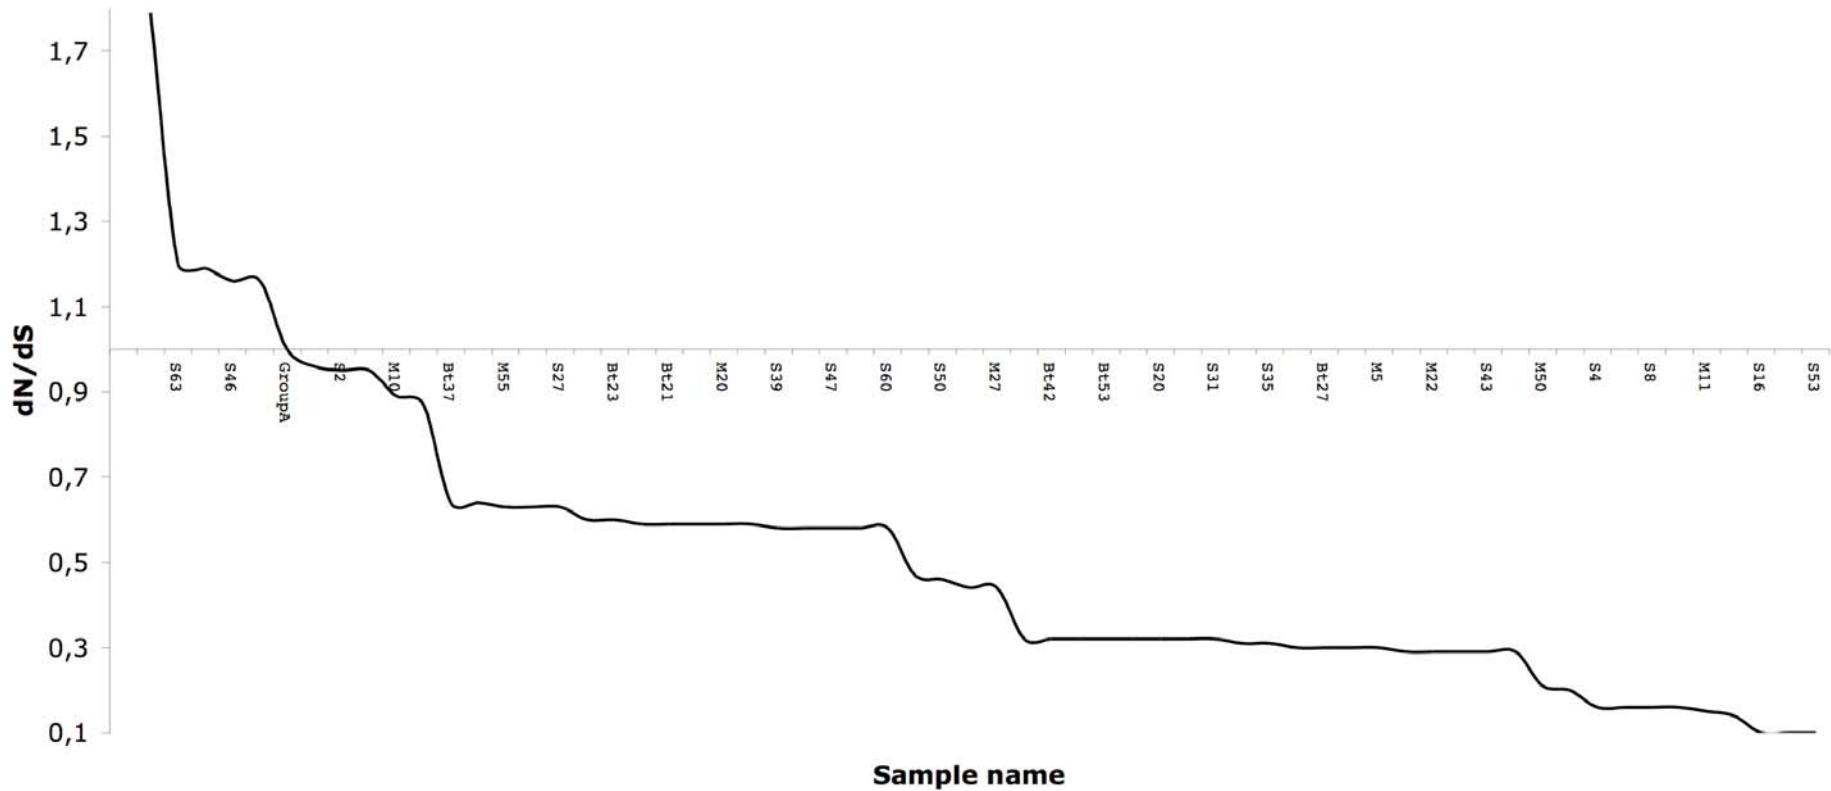

Supplement: pnas_0800072105_4.pdf [file pnas_0800072105_4.pdf]
